# Supplementary material for: Integration of a Cu2O/ZnO heterojunction and Ag@SiO2 into a photoanode for enhanced solar water oxidation
Source: Royal Society of Chemistry journal article supplement (doi:10.1039/d3ra07738a), 2024-01-01
Supplement: d3ra07738a1.pdf [file d3ra07738a1.pdf]

## **Integration of a Cu<sub>2</sub>O/ZnO heterojunction and Ag@SiO<sub>2</sub> into a photoanode for enhanced solar water oxidation**

Xuyang Zeng,<sup>ab</sup> Qianyu Gao,<sup>ab</sup> Peilin Song,<sup>b</sup> Xinru Zhang,<sup>b</sup> Jiaying Xie,<sup>b</sup> Qingwen Dong,<sup>b</sup> Junjie Qi,<sup>b</sup> Xiu-Shuang Xing,<sup>\*b</sup> and Jimin Du<sup>\*ab</sup>

<sup>a</sup>College of Chemistry, Zhengzhou University, Zhengzhou 450000, P. R. China. E-mail: djm@iccas.ac.cn

<sup>b</sup>Henan Key Laboratory of New Optoelectronic Functional Materials, College of Chemistry and Chemical Engineering, Anyang Normal University, Anyang 455000, P. R. China. E-mail: xsxing0621@163.com

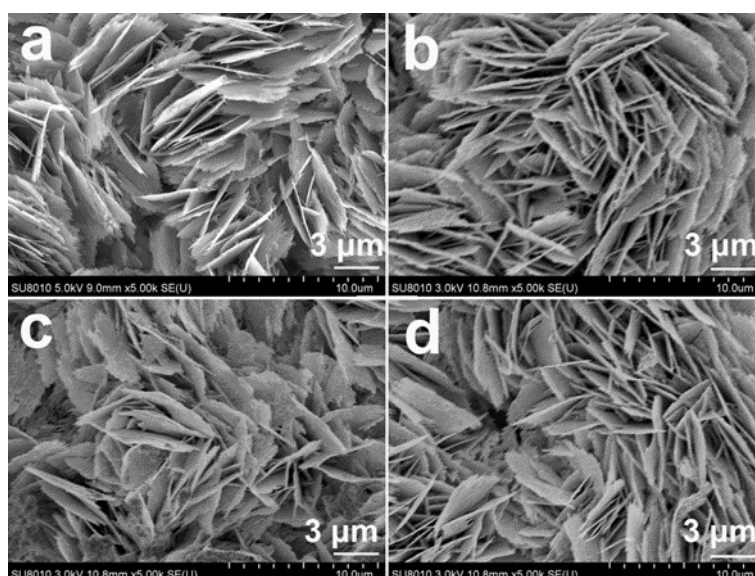

**Fig. S1** The top-view SEM images of (a) FTO/ZnO, (b) FTO/ZnO/Cu<sub>2</sub>O-1, (c) FTO/ZnO/Cu<sub>2</sub>O-2 and (d) FTO/ZnO/Cu<sub>2</sub>O-3 photoanodes.

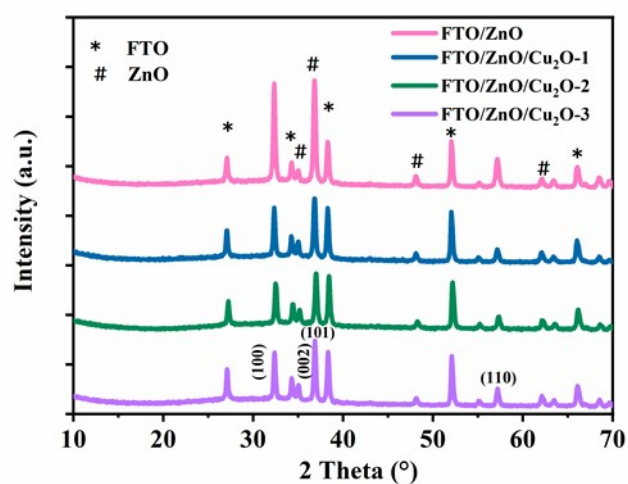

**Fig. S2** The XRD patterns of FTO/ZnO, FTO/ZnO/Cu<sub>2</sub>O-1, FTO/ZnO/Cu<sub>2</sub>O-2 and FTO/ZnO/Cu<sub>2</sub>O-3 photoanodes.

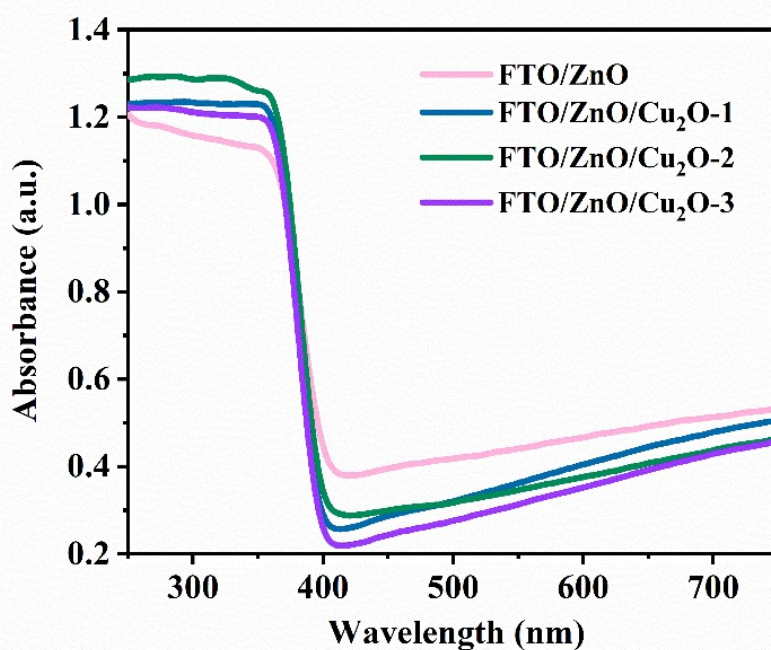

**Fig. S3** The UV-vis diffuse reflectance spectra of FTO/ZnO, FTO/ZnO/Cu<sub>2</sub>O-1, FTO/ZnO/Cu<sub>2</sub>O-2 and FTO/ZnO/Cu<sub>2</sub>O-3 photoanodes.

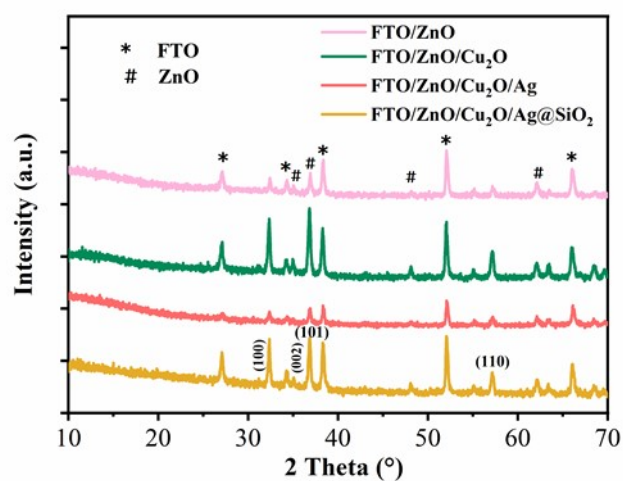

**Fig. S4** The XRD patterns of FTO/ZnO, FTO/ZnO/Cu<sub>2</sub>O, FTO/ZnO/Cu<sub>2</sub>O/Ag and FTO/ZnO/Cu<sub>2</sub>O/Ag@SiO<sub>2</sub> photoanodes.

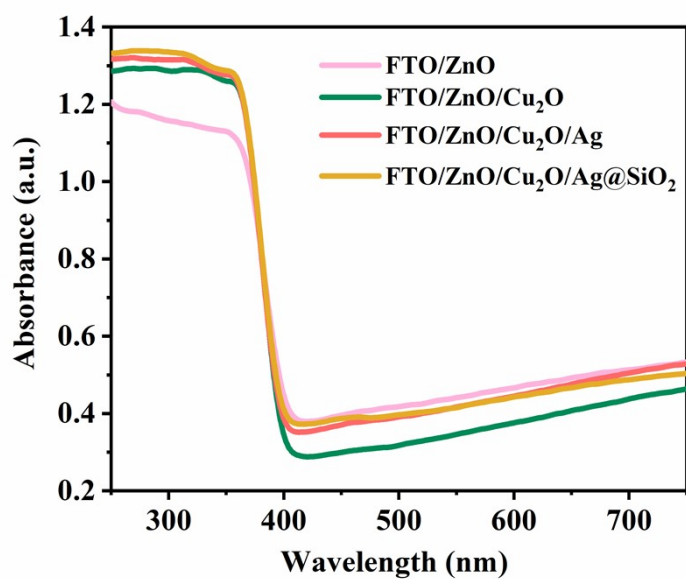

**Fig. S5** The UV-vis diffuse absorbance spectra of FTO/ZnO, FTO/ZnO/Cu<sub>2</sub>O, FTO/ZnO/Cu<sub>2</sub>O/Ag and FTO/ZnO/Cu<sub>2</sub>O/Ag@SiO<sub>2</sub> photoanodes.

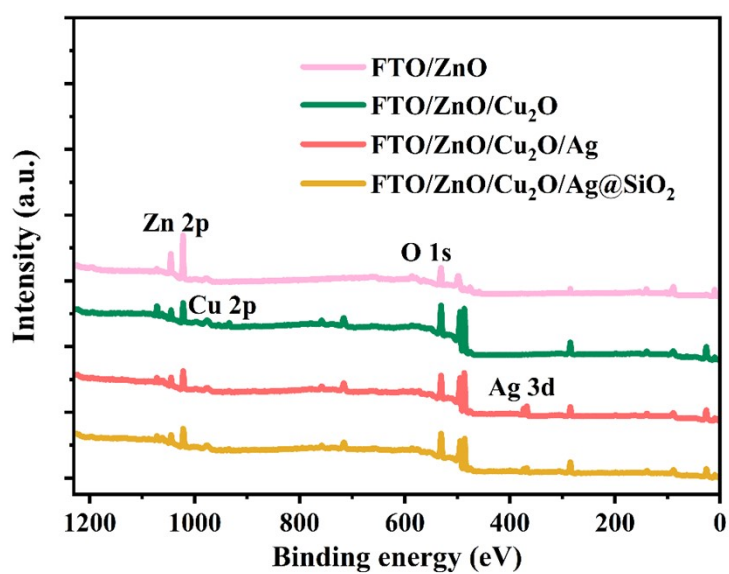

**Fig. S6** XPS survey spectra of FTO/ZnO, FTO/ZnO/Cu<sub>2</sub>O, FTO/ZnO/Cu<sub>2</sub>O/Ag and FTO/ZnO/Cu<sub>2</sub>O/Ag@SiO<sub>2</sub> photoanodes.

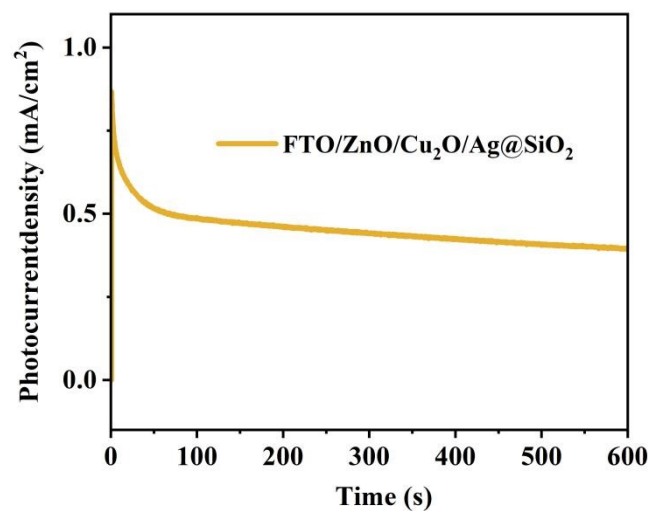

**Fig. S7**  $J-t$  curves of the FTO/ZnO/Cu<sub>2</sub>O/Ag@SiO<sub>2</sub> photoanode at 1.23 V<sub>RHE</sub> for stability study.

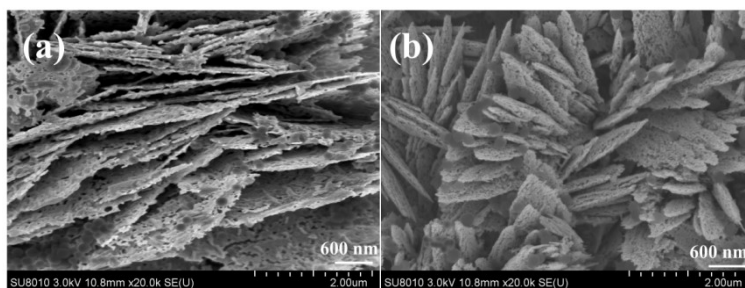

**Fig. S8** The SEM images before and after stability test of FTO/ZnO/Cu<sub>2</sub>O/Ag@SiO<sub>2</sub> photoanode.

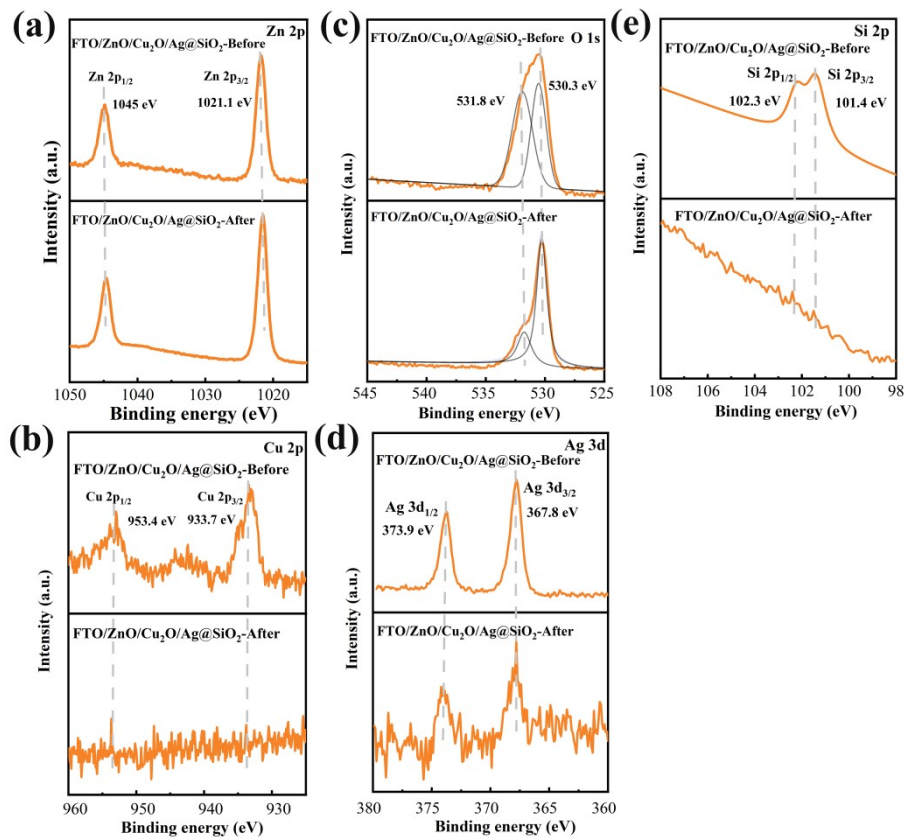

**Fig. S9** The XPS spectra before and after stability test of FTO/ZnO/Cu<sub>2</sub>O/Ag@SiO<sub>2</sub> photoanode.

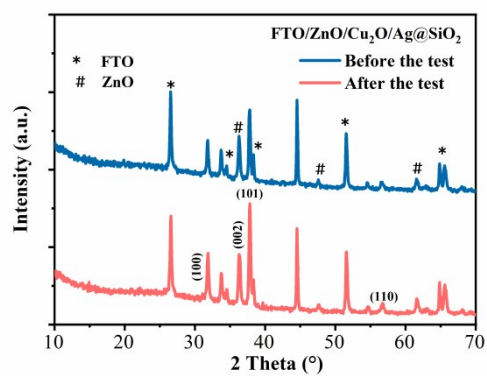

**Fig. S10** The XRD patterns before and after stability test of FTO/ZnO/Cu<sub>2</sub>O/Ag@SiO<sub>2</sub> photoanode.

**Tab. S1** A comparison of the PEC-WS performances between the ZnO photoanodes in the related literature and our present FTO/ZnO/Cu<sub>2</sub>O/Ag@SiO<sub>2</sub> photoanode.

| Photoanode                    | Film texture                                                                        | Optimized sample ( <i>J-V</i> curves)                                               | $J_{ph@1.23V}$<br>$U_{on}$                       | Testing conditions<br>(Under AM 1.5G irradiation)                  | Key Method                                           | Ref. |
|-------------------------------|-------------------------------------------------------------------------------------|-------------------------------------------------------------------------------------|--------------------------------------------------|--------------------------------------------------------------------|------------------------------------------------------|------|
| ZnO/CdO/rGO                   | 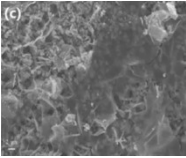   |    | 0.38 mA/cm <sup>2</sup><br>-0.2 V (vs. Ag@AgCl)  | 0.5 M Na <sub>2</sub> SO <sub>4</sub>                              | thermal decomposition and spin coating               | [1]  |
| ZnNi MOF @ZnO                 |   |   | 0.88 mA/cm <sup>2</sup><br>0.3 V <sub>RHE</sub>  | 0.5M Na <sub>2</sub> SO <sub>4</sub>                               | hydrothermal                                         | [2]  |
| Pt/ZnO/Co-Pi                  |  |  | 0.8 mA/cm <sup>2</sup><br>0.07 V <sub>RHE</sub>  | 0.1 M K <sub>3</sub> PO <sub>4</sub>                               | hydrothermal and photoelectrode position             | [3]  |
| ZnO/CdS/Au                    |  |  | 1 mA/cm <sup>2</sup><br>-0.5 V (vs. Ag@AgCl)     | 0.25 M Na <sub>2</sub> S<br>0.35 M Na <sub>2</sub> SO <sub>3</sub> | chemical bath deposition and sulfuric acid corrosion | [4]  |
| ZnO/ZnS                       |  |  | 0.08 mA/cm <sup>2</sup><br>-0.5 V (vs. Ag/AgCl)  | 0.5 M Na <sub>2</sub> SO <sub>3</sub>                              | hydrothermal                                         | [5]  |
| FTO/TiO <sub>2</sub> /ZnO/NiO |  |  | 1.91 mA/cm <sup>2</sup><br>0.35 V <sub>RHE</sub> | 1.0 M NaOH                                                         | atomic layer deposition and immersion                | [6]  |

|                                                  |                                                                                     |                                                                                     |                                                    |                                                |                                                                         |                      |
|--------------------------------------------------|-------------------------------------------------------------------------------------|-------------------------------------------------------------------------------------|----------------------------------------------------|------------------------------------------------|-------------------------------------------------------------------------|----------------------|
| ZnO/CuFeO <sub>2</sub>                           | 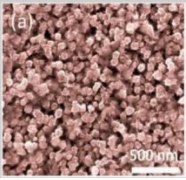   |    | 54 $\mu\text{A}/\text{cm}^2$<br>0.5 V<br>(Ag/AgCl) | 0.5 M Na <sub>2</sub> SO <sub>4</sub>          | spin coating<br>and<br>electrochemically depositing                     | [7]                  |
| Eu <sub>150</sub> /ZnO                           |    |    | 1.4 mA/cm <sup>2</sup><br>0.3 V <sub>RHE</sub>     | 0.5M Na <sub>2</sub> SO <sub>4</sub>           | electrodeposition                                                       | [8]                  |
| ZnO/ZCO                                          |    |    | 1.58 mA/cm <sup>2</sup><br>0.5 V <sub>RHE</sub>    | 0.5 M Na <sub>2</sub> SO <sub>4</sub>          | two-step<br>aqueous<br>chemical bath<br>growth and<br>electrodeposition | [9]                  |
| ZnO/CoO                                          |  |  | 1.25 mA/cm <sup>2</sup><br>-0.3 V (vs.<br>Ag@AgCl) | 10, 30 mM<br>borax with<br>sodium<br>hydroxide | ALD and<br>CBD and<br>ECD                                               | [10]                 |
| FTO/ZnO/Cu <sub>2</sub><br>O/Ag@SiO <sub>2</sub> |  |  | 0.77 mA/cm <sup>2</sup><br>0.4 V <sub>RHE</sub>    | 1.0 M NaOH                                     | hydrothermal<br>and immersion                                           | <b>This<br/>work</b> |

## Reference

- [1] L. Sun, J. Sun, X. Sun, S. Bai, Y. Zhao, R. Luo, D. Li and A. Chen, *J. Colloid Interfaces Sci.*, 2022, **608**, 2377–2386.
- [2] Z. Peng, S. C. Abbas, J. Lv, R. Yang, M. Wu and Y. Wang, *Int. J. Hydrogen Energy*, 2019, **44**, 2446–2453.
- [3] S. Zhang, Z. Liu, M. Ruan, Z. Guo, L. E. W. Zhao, D. Zhao, X. Wu and D. Chen, *Appl. Catal. B: Environ.*, 2020, **262**, 118279.



- [4] R.-B. Wei, P.-Y. Kuang, H. Cheng, Y.-B. Chen, J.-Y. Long, M.-Y. Zhang and Z.-Q. Liu, *ACS Sustain. Chem. Eng.*, 2017, **5**, 4249–4257.
- [5] C. Li, S. Chen, Y. Wang and Z. Hou, *Int. J. Hydrogen Energy*, 2019, **44**, 25416–25427.
- [6] X. Ren, X. Zeng, Y. Wang, X. Liu, A. Li, X.-S. Xing and J. Du, *ChemistrySelect*, 2022, **7**, e202203608.
- [7] K. Karmakar, A. Sarkar, K. Mandal and G. G. Khan, *Nanotechnology*, 2017, **28**, 325401.
- [8] S. Xie, W. Wei, S. Huang, M. Li, P. Fang, X. Lu and Y. Tong, *J. Power Sources*, **2015**, 2977, 9–15.
- [9] D. Maity, K. Karmakar, D. Pal, S. Saha, G. G. Khan and K. Mandal, *ACS Appl. Energy Mater.*, 2021, **4**, 11599–11608.
- [10] K. R. Nandanapalli, D. Mudusu, J.-S. Yu and S. Lee, *J. Colloid Interfaces Sci.*, 2020, **558**, 9–20.
